# Supplementary material
Source: PubMed Central journal article supplement (PMC6435416)
Supplement: NIHMS1518655-supplement-1.pdf [file NIHMS1518655-supplement-1.pdf]

Supplemental Table S1: Long range PCR primers for *CYP2D6* copy number assay

| Primer                                                                                                                                                                                                                                                                                                                      | Sequence                     | Position                    | Strand   |
|-----------------------------------------------------------------------------------------------------------------------------------------------------------------------------------------------------------------------------------------------------------------------------------------------------------------------------|------------------------------|-----------------------------|----------|
| <b>2D6dupl-F<sup>a</sup></b>                                                                                                                                                                                                                                                                                                | CCTGGGAAGGCCCATGGAAG         | chr22:42,522,003-42,522,023 | negative |
| <b>2D6dupl-R<sup>a</sup></b>                                                                                                                                                                                                                                                                                                | CAGTTACGGCAGTGGTCAGCT        | chr22:42,530,646-42,530,666 | positive |
| <b>5-2D6del<sup>b</sup></b>                                                                                                                                                                                                                                                                                                 | CACCAGGCACCTGTACTCCTC        | chr22:42,534,666-42,534,686 | negative |
| <b>3-2D6del<sup>b</sup></b>                                                                                                                                                                                                                                                                                                 | CAGGCATGAGCTAAGGCACCCAGAC    | chr22:42,519,025-42,519,049 | positive |
| <b>DPKup<sup>ab</sup></b>                                                                                                                                                                                                                                                                                                   | GTTATCCCAGAAGGCTTTGCAGGCTTCA | chr22:42,527,113-42,527,140 | negative |
| <b>DPKlow<sup>ab</sup></b>                                                                                                                                                                                                                                                                                                  | GCCGACTGAGCCCTGGGAGGTAGGTA   | chr22:42,522,040-42,522,065 | Positive |
| <sup>a</sup> PCR amplification with these primers results in 5.1kb product if no duplication is present, and 5.1 and 3.5 kb products if a duplication is present. <sup>b</sup> PCR amplification with these primers results in 5.1 kb product if no deletion present, and 5.1 and 3.5 kb products if a deletion is present. |                              |                             |          |

Supplemental Table S2: Variants used to identify *CYP2D6* star alleles

| rsID                   | rs7692<br>58 | rs28371<br>696 | rs1065<br>852 | rs5030<br>862 | rs72549<br>357  | rs50308<br>63   | rs28371<br>706 | rs5030<br>655 | rs1135<br>824 | rs5030<br>865 | rs3892<br>097 | rs28371<br>717 | rs35742<br>686 | rs5030<br>656 | rs1694<br>7  | rs5030<br>867 | rs28371<br>725 | rs59421<br>388 | rs1135<br>840 |
|------------------------|--------------|----------------|---------------|---------------|-----------------|-----------------|----------------|---------------|---------------|---------------|---------------|----------------|----------------|---------------|--------------|---------------|----------------|----------------|---------------|
| Updated<br>rsID        |              |                |               |               | rs77467<br>1100 | rs20137<br>7835 |                |               |               |               |               |                |                |               |              |               |                |                |               |
| HG19<br>chr22<br>Locus | 42526<br>763 | 425267<br>17   | 42526<br>694  | 42526<br>670  | 4252665<br>6    | 4252591<br>2    | 425257<br>72   | 42525<br>085  | 42525<br>044  | 42525<br>035  | 42524<br>947  | 425243<br>10   | 425242<br>43   | 42524<br>175  | 42523<br>943 | 42523<br>858  | 425238<br>05   | 425236<br>10   | 42522<br>613  |
| Reference              | C            | C              | G             | C             | C               | C               | G              | CA            | T             | C             | C             | C              | CT             | CCTT          | A            | T             | C              | C              | G             |
| *1                     |              |                |               |               |                 |                 |                |               |               |               |               |                |                |               | G            |               |                |                | C             |
| *2                     |              |                |               |               |                 |                 |                |               |               |               |               |                |                |               |              |               |                |                |               |
| *3                     |              |                |               |               |                 |                 |                |               |               |               |               |                | C              |               | G            |               |                |                | C             |
| *3B                    |              |                |               |               |                 |                 |                |               | C             |               |               |                | C              |               | G            |               |                |                | C             |
| *4                     |              |                | A             |               |                 |                 |                |               |               |               | T             |                |                |               | G            |               |                |                |               |
| *5                     | ∅            | ∅              | ∅             | ∅             | ∅               | ∅               | ∅              | ∅             | ∅             | ∅             | ∅             | ∅              | ∅              | ∅             | ∅            | ∅             | ∅              | ∅              | ∅             |
| *6                     |              |                |               |               |                 |                 |                | C             |               |               |               |                |                |               | G            |               |                |                | C             |
| *6C                    |              |                |               |               |                 |                 |                | C             |               |               |               |                |                |               | G            |               |                |                |               |
| *7                     |              |                |               |               |                 |                 |                |               |               |               |               |                |                |               | G            | G             |                |                | C             |
| *8                     |              |                |               |               |                 |                 |                |               |               | A             |               |                |                |               |              |               |                |                |               |
| *9                     |              |                |               |               |                 |                 |                |               |               |               |               |                |                | C             | G            |               |                |                | C             |
| *10                    |              |                | A             |               |                 |                 |                |               |               |               |               |                |                |               | G            |               |                |                |               |
| *11                    |              |                |               |               |                 | G               |                |               |               |               |               |                |                |               |              |               |                |                |               |
| *12                    |              |                |               | T             |                 |                 |                |               |               |               |               |                |                |               |              |               |                |                |               |
| *14A                   |              |                | A             |               |                 |                 |                |               |               |               | T             |                |                |               |              |               |                |                |               |
| *14B                   |              |                |               |               |                 |                 |                |               |               |               | T             |                |                |               |              |               |                |                |               |
| *15                    |              |                |               |               | CA              |                 |                |               |               |               |               |                |                |               | G            |               |                |                | C             |
| *17                    |              |                |               |               |                 |                 | A              |               |               |               |               |                |                |               |              |               |                |                |               |
| *29                    |              |                |               |               |                 |                 |                |               |               |               |               |                |                |               |              |               |                | T              |               |
| *33                    |              |                |               |               |                 |                 |                |               |               |               |               | A              |                |               | G            |               |                |                | C             |
| *35                    | T            |                |               |               |                 |                 |                |               |               |               |               |                |                |               |              |               |                |                |               |
| *41                    |              |                |               |               |                 |                 |                |               |               |               |               |                |                |               |              |               | T              |                |               |
| *46                    |              | T              |               |               |                 |                 |                |               |               |               |               |                |                |               |              |               |                |                |               |

∅ - No alleles, as \*5 is deletion of the *CYP2D6* gene

Supplemental Table S3: Genotype and phenotype characteristics of study cohort

| Diplotype      | Number of Individuals | Frequency (%) | Phenotype |
|----------------|-----------------------|---------------|-----------|
| CYP2D6 *1/*2xN | 4                     | 1.6           | UM        |
| CYP2D6 *1/*1xN | 1                     | 0.4           | UM        |
| CYP2D6 *1xN/*2 | 1                     | 0.4           | UM        |
| CYP2D6 *1/*1   | 39                    | 15.2          | NM        |
| CYP2D6 *1/*2   | 37                    | 14.4          | NM        |
| CYP2D6 *1/*4   | 34                    | 13.2          | NM        |
| CYP2D6 *2/*4   | 17                    | 6.6           | NM        |
| CYP2D6 *1/*41  | 14                    | 5.4           | NM        |
| CYP2D6 *1/*35  | 10                    | 3.9           | NM        |
| CYP2D6 *2/*41  | 9                     | 3.5           | NM        |
| CYP2D6 *1/*9   | 8                     | 3.1           | NM        |
| CYP2D6 *1/*17  | 6                     | 2.3           | NM        |
| CYP2D6 *1/*5   | 6                     | 2.3           | NM        |
| CYP2D6 *1/*3   | 4                     | 1.6           | NM        |
| CYP2D6 *2/*2   | 4                     | 1.6           | NM        |
| CYP2D6 *1/*29  | 3                     | 1.2           | NM        |
| CYP2D6 *2/*6   | 3                     | 1.2           | NM        |
| CYP2D6 *35/*41 | 3                     | 1.2           | NM        |
| CYP2D6 *2/*17  | 2                     | 0.8           | NM        |
| CYP2D6 *2/*35  | 2                     | 0.8           | NM        |
| CYP2D6 *2/*5   | 2                     | 0.8           | NM        |
| CYP2D6 *3/*35  | 2                     | 0.8           | NM        |
| CYP2D6 *4/*35  | 2                     | 0.8           | NM        |
| CYP2D6 *1/*10  | 1                     | 0.4           | NM        |
| CYP2D6 *1/*33  | 1                     | 0.4           | NM        |
| CYP2D6 *1/*6   | 1                     | 0.4           | NM        |
| CYP2D6 *10/*35 | 1                     | 0.4           | NM        |
| CYP2D6 *10/*46 | 1                     | 0.4           | NM        |
| CYP2D6 *1xN/*4 | 1                     | 0.4           | NM        |
| CYP2D6 *2/*10  | 1                     | 0.4           | NM        |
| CYP2D6 *2/*29  | 1                     | 0.4           | NM        |
| CYP2D6 *2/*3   | 1                     | 0.4           | NM        |
| CYP2D6 *2/*9   | 1                     | 0.4           | NM        |
| CYP2D6 *35/*35 | 1                     | 0.4           | NM        |
| CYP2D6 *17/*5  | 3                     | 1.2           | IM        |
| CYP2D6 *4/*10  | 3                     | 1.2           | IM        |
| CYP2D6 *4/*41  | 3                     | 1.2           | IM        |
| CYP2D6 *4/*9   | 3                     | 1.2           | IM        |
| CYP2D6 *3/*41  | 2                     | 0.8           | IM        |
| CYP2D6 *10/*5  | 1                     | 0.4           | IM        |

|                |   |     |    |
|----------------|---|-----|----|
| CYP2D6 *4/*17  | 1 | 0.4 | IM |
| CYP2D6 *4/*29  | 1 | 0.4 | IM |
| CYP2D6 *41/*5  | 1 | 0.4 | IM |
| <hr/>          |   |     |    |
| CYP2D6 *4/*4   | 7 | 2.7 | PM |
| CYP2D6 *3/*4   | 5 | 1.9 | PM |
| CYP2D6 *3/*5   | 1 | 0.4 | PM |
| CYP2D6 *4/*4xN | 1 | 0.4 | PM |
| CYP2D6 *4/*6   | 1 | 0.4 | PM |
| <hr/>          |   |     |    |

Supplemental Table S4: Adverse event characteristics and frequencies by metabolizer status

| Adverse Event (AE)                 | Individuals with AE<br><i>n=104</i> (%) | Poor Metabolizers with AE, <i>n=15</i> (%) | Intermediate Metabolizers with AE, <i>n=18</i> (%) | Normal Metabolizers with AE, <i>n=218</i> (%) | Ultrarapid Metabolizers with AE, <i>n=6</i> (%) |
|------------------------------------|-----------------------------------------|--------------------------------------------|----------------------------------------------------|-----------------------------------------------|-------------------------------------------------|
| Weight change                      | 23 (8.9)                                | 0                                          | 5 (27.8)                                           | 17 (7.8)                                      | 1 (16.7)                                        |
| Extrapyramidal symptoms            | 16 (6.2)                                | 1 (6.7)                                    | 0                                                  | 14 (6.4)                                      | 1 (16.7)                                        |
| Hypersomnia or sedation            | 15 (5.8)                                | 2 (13.3)                                   | 2 (11.1)                                           | 11 (5)                                        | 0                                               |
| Hyperphagia or increased appetite  | 11 (4.3)                                | 0                                          | 1 (5.6)                                            | 10 (4.6)                                      | 0                                               |
| Elevation of blood glucose         | 5 (1.9)                                 | 0                                          | 1 (5.6)                                            | 4 (1.8)                                       | 0                                               |
| Abnormal thyroid function test     | 5 (1.9)                                 | 0                                          | 2 (11.1)                                           | 3 (1.4)                                       | 0                                               |
| Hyperprolactinemia or gynecomastia | 4 (1.6)                                 | 0                                          | 2 (11.1)                                           | 2 (0.9)                                       | 0                                               |
| Hyper salivation                   | 4 (1.6)                                 | 0                                          | 1 (5.6)                                            | 3 (1.4)                                       | 0                                               |
| Elevation of serum lipids          | 3 (1.2)                                 | 0                                          | 1 (5.6)                                            | 2 (0.9)                                       | 0                                               |
| QTc prolongation                   | 3 (1.2)                                 | 0                                          | 1 (5.6)                                            | 2 (0.9)                                       | 0                                               |
| Behavioral concerns                | 3 (1.2)                                 | 0                                          | 1 (5.6)                                            | 2 (0.9)                                       | 0                                               |
| Anxiety or nervousness             | 2 (0.8)                                 | 0                                          | 0                                                  | 2 (0.9)                                       | 0                                               |
| Constipation                       | 2 (0.8)                                 | 0                                          | 0                                                  | 2 (0.9)                                       | 0                                               |
| Precocious puberty                 | 2 (0.8)                                 | 0                                          | 0                                                  | 2 (0.9)                                       | 0                                               |
| Muscle cramps                      | 1 (0.4)                                 | 1 (6.7)                                    | 0                                                  | 0                                             | 0                                               |
| Headache                           | 1 (0.4)                                 | 0                                          | 0                                                  | 1 (0.5)                                       | 0                                               |
| Hot flashes                        | 1 (0.4)                                 | 0                                          | 0                                                  | 0                                             | 1 (16.7)                                        |
| Fainting episode                   | 1 (0.4)                                 | 0                                          | 0                                                  | 0                                             | 1 (16.7)                                        |
| Bruising                           | 1 (0.4)                                 | 0                                          | 1 (5.6)                                            | 0                                             | 0                                               |
| Oculogyric crisis                  | 1 (0.4)                                 | 1 (6.7)                                    | 0                                                  | 0                                             | 0                                               |

Supplemental Table S5: Cohort characteristics by adverse event presence

| Characteristics                                 | Adverse Event<br>(Frequency (%) or<br>median (IQR)) | No Adverse Event<br>(Frequency (%) or<br>median (IQR)) | <i>P</i> value*  |
|-------------------------------------------------|-----------------------------------------------------|--------------------------------------------------------|------------------|
| Age                                             | 8.4 (6.3-10.7)                                      | 8.3 (6.3-10.3)                                         | 0.8              |
| Male sex                                        | 57 (75)                                             | 131 (72.4)                                             | 0.8              |
| Race                                            |                                                     |                                                        | <b>0.04</b>      |
| White                                           | 64 (84.2)                                           | 153 (84.5)                                             |                  |
| African-American                                | 6 (7.9)                                             | 23 (12.7)                                              |                  |
| Asian/Pacific islander                          | 1 (1.3)                                             | 4 (2.2)                                                |                  |
| Unknown                                         | 4 (5.3)                                             | 1 (0.6)                                                |                  |
| Native American                                 | 1 (1.3)                                             | 0                                                      |                  |
| Ethnicity                                       |                                                     |                                                        | 0.3              |
| Hispanic                                        | 1 (1.3)                                             | 5 (2.8)                                                |                  |
| Non-Hispanic                                    | 72 (94.7)                                           | 174 (96.1)                                             |                  |
| Unknown                                         | 3 (4)                                               | 2 (1.1)                                                |                  |
| Specific indication for risperidone             |                                                     |                                                        |                  |
| Aggression                                      | 45 (59.2)                                           | 80 (44.2)                                              | <b>0.03</b>      |
| Behavioral problems                             | 20 (26.3)                                           | 59 (32.6)                                              | 0.4              |
| Agitation                                       | 16 (21.1)                                           | 26 (14.4)                                              | 0.2              |
| Irritability                                    | 25 (32.9)                                           | 38 (21)                                                | 0.06             |
| Self-injurious behaviors                        | 25 (32.9)                                           | 20 (11.1)                                              | <b>&lt;0.001</b> |
| Baseline dosing regimen of risperidone (mg/day) | 0.5 (0.4-1)                                         | 0.5 (0.5-1)                                            | 0.6              |

\**P* values from Kruskal-Wallis test for continuous variables and Fisher's exact for categorical variables. IQR – Interquartile Range
